# Supplementary material for: Unique hierarchical NiFe-LDH/Ni/NiCo2S4 heterostructure arrays on nickel foam for the improvement of overall water splitting activity
Source: Royal Society of Chemistry journal article supplement (doi:10.1039/d4nr05248j), 2025-01-01
Supplement: d4nr05248j1.pdf [file d4nr05248j1.pdf]

## Supporting Information:

# Unique hierarchical NiFe-LDH/Ni/NiCo<sub>2</sub>S<sub>4</sub> heterostructure arrays on nickel foam for the improvement of overall water splitting activity

Xi-Song Gong,<sup>a,1</sup> Xing Liu<sup>a,1</sup> and Jian Zhou<sup>a,\*</sup>

*<sup>a</sup>Chongqing Key Laboratory of inorganic functional materials, College of chemistry, Chongqing normal university, Chongqing, 401331, P.R. China*

### Corresponding author:

**Prof. & Dr. Jian Zhou**

\*\*\*\*\*

Prof. & Dr. Jian Zhou

College of chemistry,

Chongqing normal university

Chongqing, 401331,

P.R. China

E-mail: Jianzhou888888@163.com

\*\*\*\*\*

<sup>1</sup>These authors contributed equally.

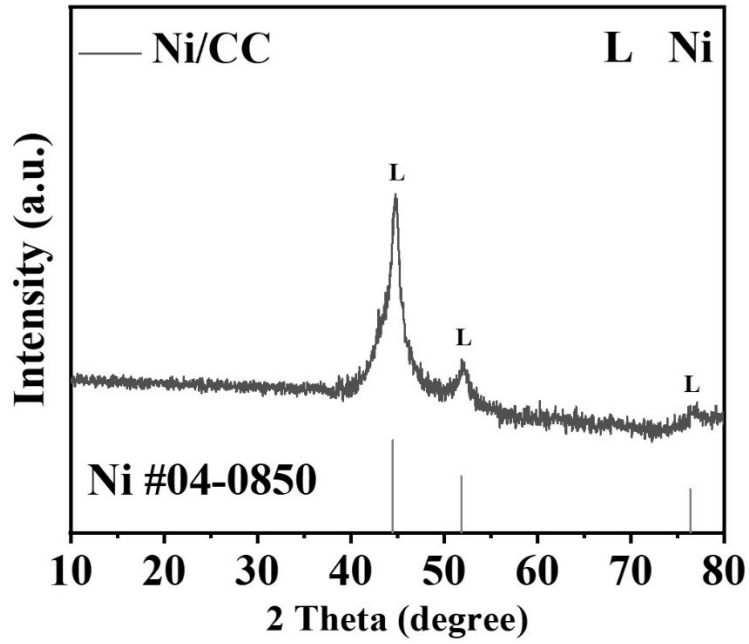

Fig. S1. The XRD patterns of the Ni/CC.

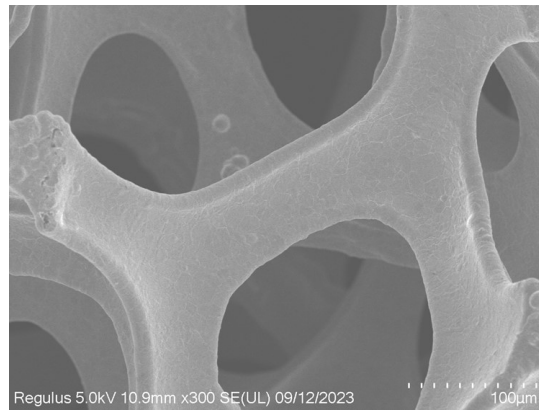

Fig. S2. The SEM of NF.

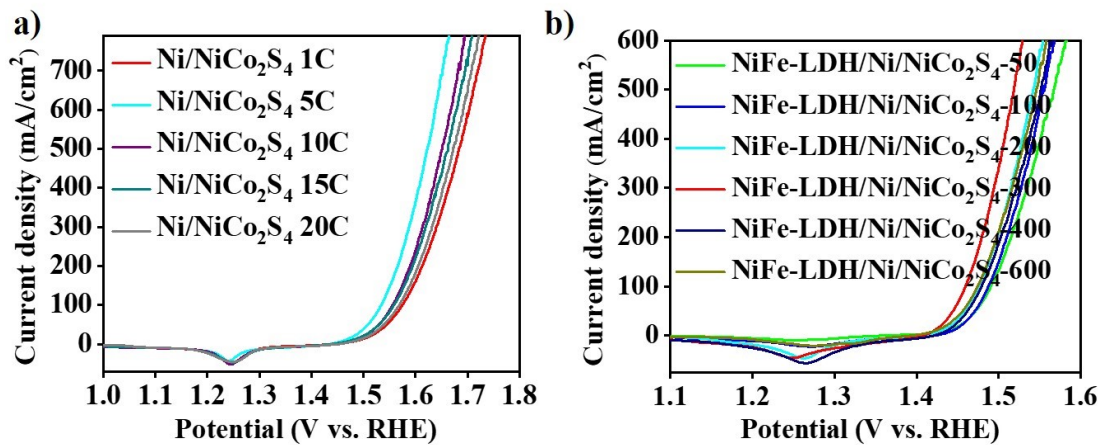

Fig. S3. OER polarization curves of (a) different electrodeposition cycles of the Ni nanoparticles (b) different electrodeposition times of the NiFe-LDH.

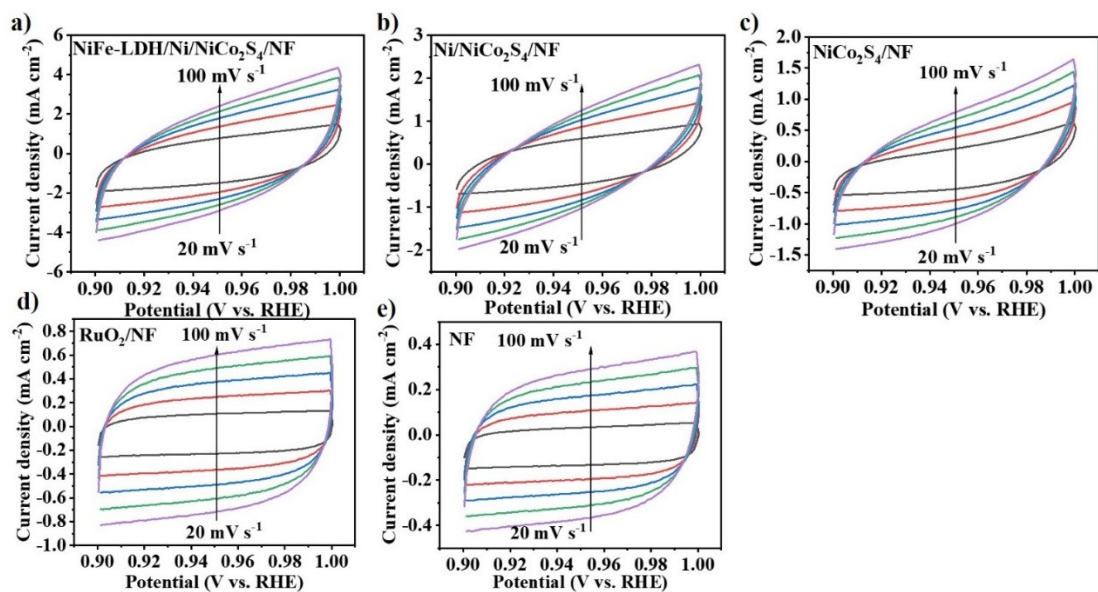

**Fig. S4.** CV curves for determining electrochemical activity surface area (ECSA) of NiFe-LDH/Ni/NiCo<sub>2</sub>S<sub>4</sub>/NF (a), Ni/NiCo<sub>2</sub>S<sub>4</sub>/NF (b), NiCo<sub>2</sub>S<sub>4</sub>/NF (c), RuO<sub>2</sub>/NF (d), and NF (e).

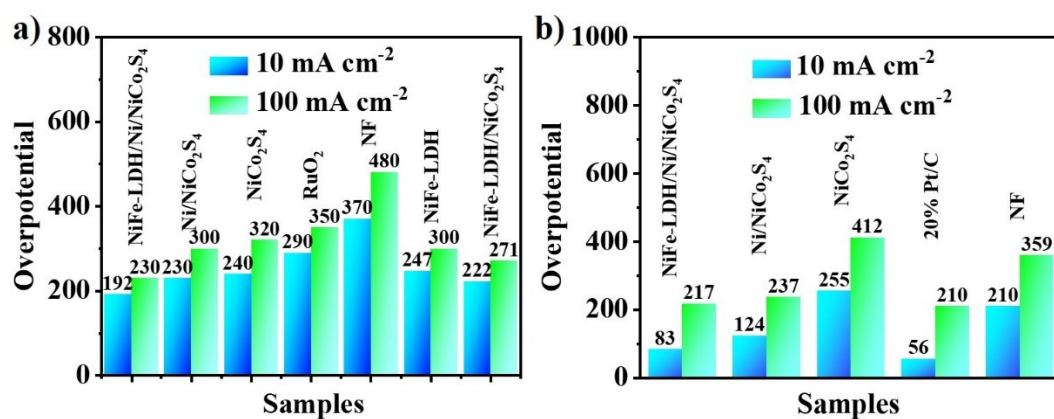

**Fig. S5.** Overpotential histogram of different samples at different current densities (a) Overpotential for OER, (b) Overpotential for HER.

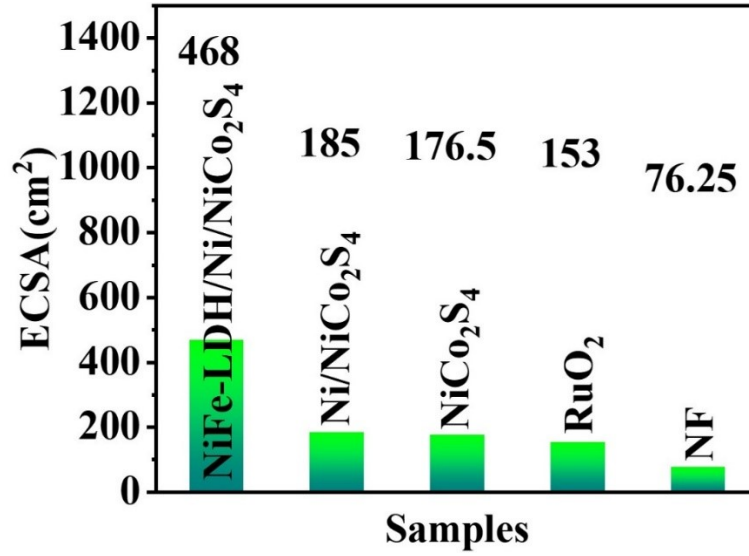

Fig S6. Calculation of ECSA values.

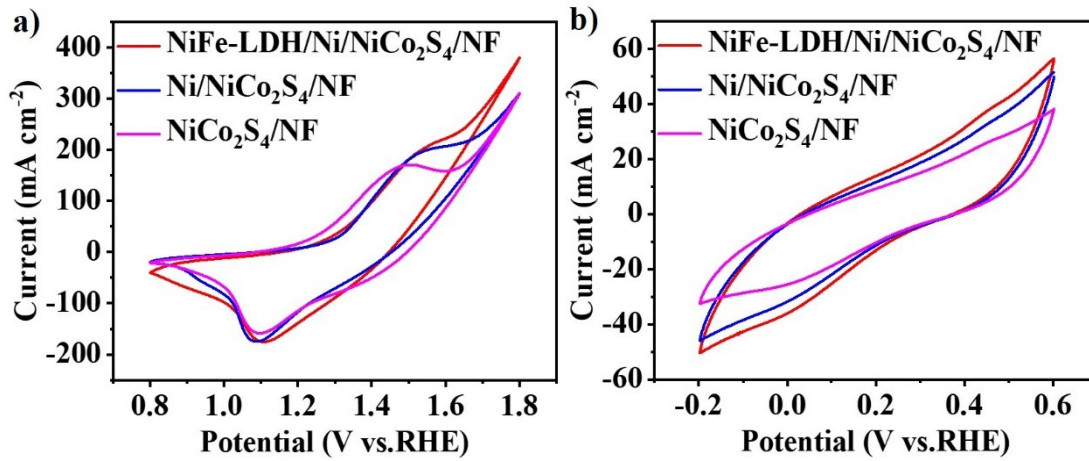

Fig. S7. CV curves of (a) NiFe-LDH/Ni/NiCo<sub>2</sub>S<sub>4</sub>/NF, Ni/NiCo<sub>2</sub>S<sub>4</sub>/NF, and NiCo<sub>2</sub>S<sub>4</sub>/NF in 1.0 M PBS (pH = 6.87) with a scan rate of 50 mV s<sup>-1</sup>. (b) NiFe-LDH/Ni/NiCo<sub>2</sub>S<sub>4</sub>/NF, Ni/NiCo<sub>2</sub>S<sub>4</sub>/NF, and NiCo<sub>2</sub>S<sub>4</sub>/NF for determining the redox surface sites of Ni<sup>2+</sup>/Ni<sup>3+</sup> in 1.0 M KOH with a scan rate of 50 mV s<sup>-1</sup>.

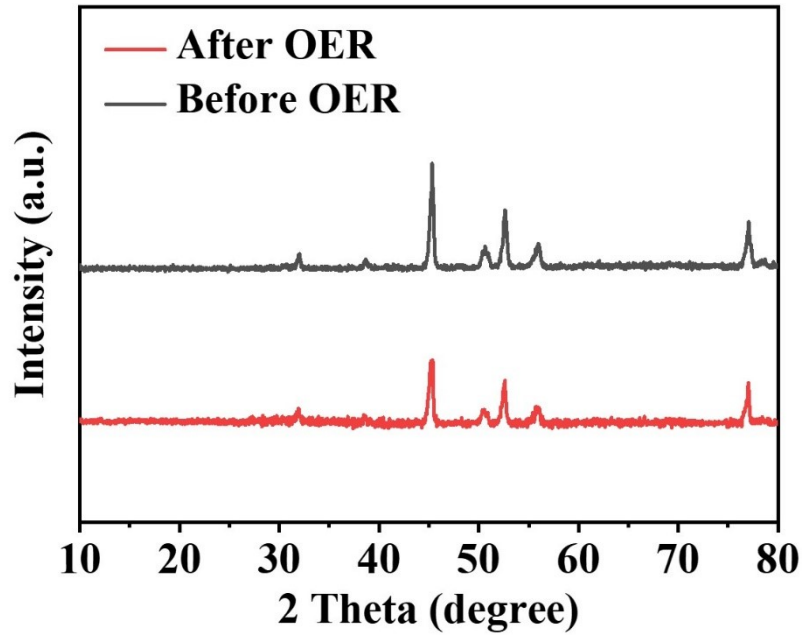

**Fig. S8.** The XRD of NiFe-LDH/Ni/NiCo<sub>2</sub>S<sub>4</sub>/NF after OER stability test.

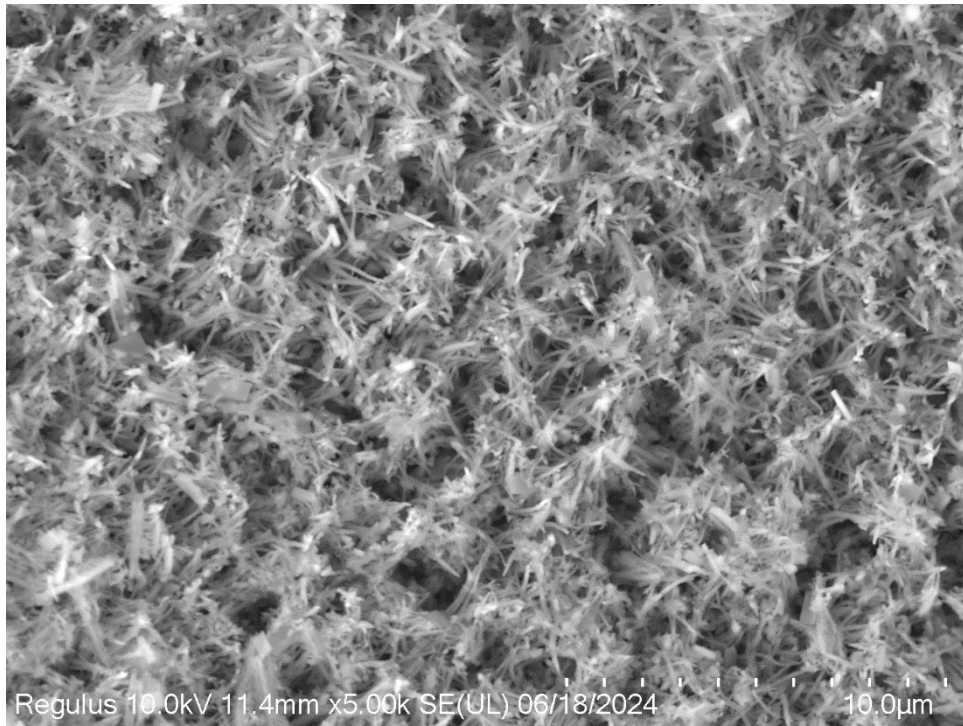

**Fig. S9.** The SEM image of NiFe-LDH/Ni/NiCo<sub>2</sub>S<sub>4</sub>/NF after OER stability test.

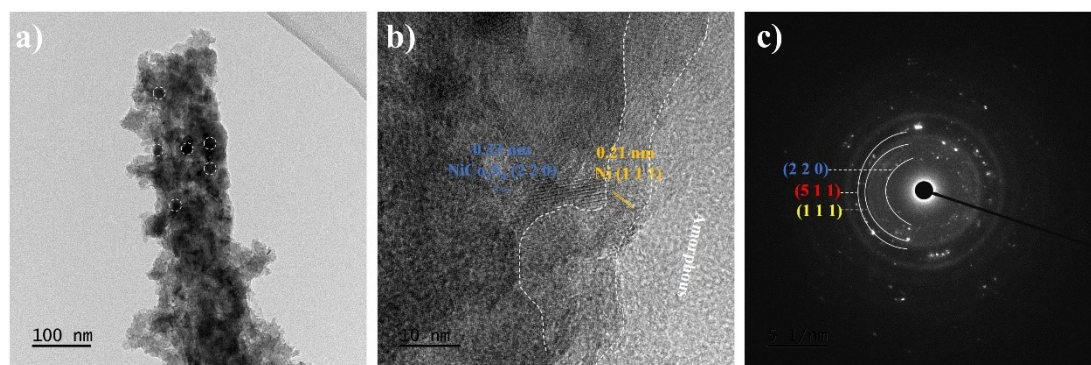

**Fig. S10.** The TEM and HRTEM images (a-b) of NiFe-LDH/Ni/NiCo<sub>2</sub>S<sub>4</sub>/NF after OER stability test, (c) SAED pattern of NiFe-LDH/Ni/NiCo<sub>2</sub>S<sub>4</sub>.

**Table S1** Comparison of OWS performance of the reported electrocatalysts.

| Catalysts                                                                       | Substrate | Electrolyte | Voltage (V) | Current density<br>(mA·cm <sup>-2</sup> ) | Ref       |
|---------------------------------------------------------------------------------|-----------|-------------|-------------|-------------------------------------------|-----------|
| NiFe-LDH/Ni/NiCo <sub>2</sub> S <sub>4</sub>                                    | NF        | 1.0 M KOH   | 1.53        | 10                                        | This work |
| Ni@NiFe LDH                                                                     | NF        | 1.0 M KOH   | 1.53        | 10                                        | [1]       |
| MoO <sub>3</sub> /Ni-NiO                                                        | CC        | 1.0 M KOH   | 1.55        | 10                                        | [2]       |
| NiCo <sub>2</sub> S <sub>4</sub> @NiFe LDH                                      | NF        | 1.0 M KOH   | 1.60        | 10                                        | [3]       |
| Ni/MoO <sub>2</sub> @CN                                                         | NF        | 1.0 M KOH   | 1.73        | 200                                       | [4]       |
| NiCoSe <sub>2</sub> @NiO@CoNi <sub>2</sub> S <sub>4</sub> @<br>CoS <sub>2</sub> | NF        | 1.0 M KOH   | 1.583       | 100                                       | [5]       |
| Ni <sub>0.75</sub> Fe <sub>0.125</sub> V <sub>0.125</sub> LDHs                  | NF        | 1.0 M KOH   | 1.591       | 10                                        | [6]       |
| POM@ZnCoS                                                                       | NF        | 1.0 M KOH   | 1.56        | 10                                        | [7]       |
| CdFe-BDC                                                                        | NF        | 1.0 M KOH   | 1.68        | 10                                        | [8]       |
| NiFe LDH@NiCoP                                                                  | NF        | 1.0 M KOH   | 1.57        | 10                                        | [9]       |
| NiFe-LDH/NiCo <sub>2</sub> O <sub>4</sub>                                       | NF        | 1.0 M KOH   | 1.60        | 10                                        | [10]      |
| FeOOH/NiCo <sub>2</sub> S <sub>4</sub> /Ni <sub>3</sub> S <sub>2</sub>          | NF        | 1.0 M KOH   | 1.55        | 10                                        | [11]      |
| CoP/Co <sub>3</sub> O <sub>4</sub>                                              | TM        | 1.0 M KOH   | 1.59        | 10                                        | [12]      |
| MnO <sub>x</sub> /NiCoP                                                         | NF        | 1.0 M KOH   | 1.59        | 10                                        | [13]      |
| N-doped Fe <sub>2</sub> O <sub>3</sub> /NiTe <sub>2</sub>                       | NF        | 1.0 M KOH   | 1.54        | 10                                        | [14]      |
| Co <sub>0.15</sub> @ARC                                                         | CC        | 1.0 M KOH   | 1.64        | 10                                        | [15]      |

**Table S2.** The resistance value of each component in the equivalent electrical circuit.

| Samples                                          | $R_s$ ( $\Omega$ ) | $R_{ct}$ ( $\Omega$ ) |
|--------------------------------------------------|--------------------|-----------------------|
| NiFe-LDH/Ni/NiCo <sub>2</sub> S <sub>4</sub> /NF | 1.87               | 0.52                  |
| Ni/NiCo <sub>2</sub> S <sub>4</sub> /NF          | 1.91               | 3.85                  |
| NiFe-LDH/NiCo <sub>2</sub> S <sub>4</sub> /NF    | 1.95               | 1.96                  |
| NiCo <sub>2</sub> S <sub>4</sub> /NF             | 2.00               | 5.22                  |
| NF                                               | 1.98               | 45.01                 |
| RuO <sub>2</sub>                                 | 1.63               | 13.76                 |

### References

- 1 Z. Y. Cai, X. M. Bu, P. Wang, W. Q. Su, R. J. Wei, J. C. Ho, J. H. Yang and X. Y. Wang, *J. Mater. Chem. A*, 2019, **7**, 21722-21729.
- 2 J. Y. Zhang, J. Liang, B. Mei, K. Lan, L. Zu, T. Zhao, Y. Ma, Y. Chen, Z. Lv, Y. Yang, C. Yu, Z. Xu, B. Y. Xia, W. Li, Q. Yuan and D. Zhao, *Adv. Energy Mater.*, 2022, **12**, 2200001.
- 3 J. Liu, J. S. Wang, B. Zhang, Y. J. Ruan, L. Lv, X. Ji, K. Xu, L. Miao and J. J. Jiang, *ACS Appl. Mater. Interfaces*, 2017, **9**, 15364-15372.
- 4 G. F. Qian, J. L. Chen, T. Q. Yu, J. C. Liu, L. Luo and S. B. Yin, *Nano-Micro Lett.*, 2021, **14**, 20.
- 5 Z. F. Xu, H. L. Pan, Y. Lin, Z. Yang, J. L. Wang and Y. Q. Gong, *J. Mater. Chem. A*, 2018, **6**, 18641-18648.
- 6 K. N. Dinh, P. L. Zheng, Z. F. Dai, Y. Zhang, R. Dangol, Y. Zheng, B. Li, Y. Zong and Q. Y. Yan, *Small*, 2018, **14**, 1703257.
- 7 J. Gautam, Y. Liu, J. Gu, Z. Y. Ma, J. J. Zha, B. Dahal, L. N. Zhang, A. N. Chishti, L. Ni, G. W. Diao and Y. G. Wei, *Adv. Funct. Mater.*, 2021, **31**, 2106147.
- 8 Y. Luo, X. Yang, L. He, Y. Zheng, J. Pang, L. Wang, R. Jiang, J. Hou, X. Guo and L. Chen, *ACS Appl. Mater. Interfaces*, 2022, **14**, 46374-46385.
- 9 H. Zhang, X. Li, A. Hähnel, V. Naumann, C. Lin, S. Azimi, S. L. Schweizer, A. W. Maijenburg and R. B. Wehrspohn, *Adv. Funct. Mater.*, 2018, **28**, 1706847.
- 10 Z. Wang, S. Zeng, W. Liu, X. Wang, Q. Li, Z. Zhao and F. Geng, *ACS Appl. Mater. Interfaces*, 2017, **9**, 1488-1495.
- 11 S. Gopalakrishnan, H. Santhana Krishnan, S. K. Eswaran and N. Mani, *ACS Appl. Nano Mater.*,

2024, **7**, 22674-22683.

12 G. Tian, X. Liu, S. Song, Q. Zhang, Z. Wang, Y. Liu, Z. Zheng, H. Cheng, Y. Dai, B. Huang and P. Wang, *Chem. Eur. J.*, 2023, **29**, e202301478.

13 Z. Zhang, L. Han and K. Tao, *Dalton Trans.*, 2024, **53**, 1757-1765.

14 W. Li, Y. Deng, L. Luo, Y. Du, X. Cheng and Q. Wu, *J. Colloid Interface Sci.*, 2023, **639**, 416-423.

15 Y. Zhou, Y. Luo, Q. Li, J. Liang, F. Liu, Y. Cai, L. Lin, Q. Wu and K. Li, *Energy Fuels*, 2024, **38**, 15560-15570.
